# Supplementary material for: Transcriptome Profiling of Resistance to Fusarium oxysporum f. sp. conglutinans in Cabbage (Brassica oleracea) Roots
Source: PLoS One. 2016 Feb 5;11(2):e0148048. doi: 10.1371/journal.pone.0148048 (PMC4744058; doi:10.1371/journal.pone.0148048)
Supplement: S3 Table — (XLS) [file pone.0148048.s003.xls]

## Sheet: Sheet1
Detailed expression patterns and annotations of transcription factors related to the defense system.
transcription factors	gene_id	Gene Length	NR Description	NT Description	KO Description	Http Link	Swissprot Description	PFAM description	Gene Ontology Biological Pathway	BP Description	Gene Ontology Molecular Function	MF Description	Gene Ontology Cellular Component	CC Description	KOG ID	KOG Description	ath_id	subject_id	subject_description	FW4-RPKM	DW4-RPKM	log2(foldchange)	FW12-RPKM	DW12-RPKM	log2(foldchange)-12	FW24-RPKM	DW24-RPKM	log2(foldchange)-24	FW48-RPKM	DW48-RPKM	log2(foldchange)-48	gene_sequense
WRKY	comp34755_c0	2204	WRKY DNA-binding protein 72 [Arabidopsis lyrata subsp. lyrata]	Arabidopsis lyrata subsp. lyrata WRKY DNA-binding protein 72 (WRKY72), mRNA	--	--	Probable WRKY transcription factor 72 OS=Arabidopsis thaliana GN=WRKY72 PE=2 SV=1	WRKY DNA -binding domain//Seryl-tRNA synthetase N-terminal domain	GO:0006544//GO:0006563//GO:0006566//GO:0006434//GO:0006355	glycine metabolic process//L-serine metabolic process//threonine metabolic process//seryl-tRNA aminoacylation//regulation of transcription, DNA-dependent	GO:0043565//GO:0000166//GO:0005524//GO:0003700//GO:0004828	sequence-specific DNA binding//nucleotide binding//ATP binding//sequence-specific DNA binding transcription factor activity//serine-tRNA ligase activity	GO:0005737//GO:0005667	cytoplasm//transcription factor complex	--	--	AT5G15130	Bra008719|Bra008719.1	AT5G15130 (E=6e-198) WRKY72, ATWRKY72 | WRKY72; transcription factor	62.9438995	164.126437335387	-1.38266918120847	100.1969525	49.9216998284317	1.00509966573336	18.61610315	17.9347161492635	0.0537961976057535	59.0658343246318	18.354647191316	1.68617848451718	GTAAGATGGATTTTTTGGTGAGTATTTATAGGTTGATTGTTATTAGAAATTATAAGACAAAAATAGGAAATTTTAACGAATTTGTGATTCGTCAAAGAAGTTAGGAGATAAAACCGGATTGTGTGTTCTAGATTTTCGTTTGTAATCACAAATAACATCACGTATATCTTTACAGCTAAAGCTACATGAATCACCAAACTTTAGAAGATAAGCACTACACAGTACACACCATTTGTATGTTGCACCGCGTAATCAGTTGGACGTTTTCTTTTTTTATGTCAAAGATATTTGGCCCGTTATTTTAGGCCTAGTAAGGTTGAGTTTCCCTAATCAGAAACGTCAAAGCGTCCTAACTCACAAAAAAAAAGAGATGAAAACACTTAAACGACGAACATGATA…
bHLH	comp32971_c1	1971	transcription factor bHLH96 [Arabidopsis thaliana]	Arabidopsis thaliana transcription factor bHLH96 (AT1G72210) mRNA, complete cds	--	--	Transcription factor bHLH96 OS=Arabidopsis thaliana GN=BHLH96 PE=2 SV=1	UV radiation resistance protein and autophagy-related subunit 14	GO:0010508	positive regulation of autophagy	GO:0003700//GO:0003677	sequence-specific DNA binding transcription factor activity//DNA binding	GO:0005634//GO:0005667	nucleus//transcription factor complex	--	--	AT1G72210	Bra003886|Bra003886.1	AT1G72210 (E=3e-123) | basic helix-loop-helix (bHLH) family protein (bHLH096)	85.15139553	8.11977071472671	3.39051927973176	53.87222348	23.538475791798	1.19452070780744	113.53125791	36.5021459398757	1.63703637435811	45.1871847099379	32.6506969281752	0.468799889422581	TAAATTTTTAACGGAAACTTGGAATTTCTTATGAATTTGATTTTCGGATCAAAAAATTCTGGTGCTTTGTGATCGAAAAAGATTCTAACAATATGAAGCTTACTGCTAAATCAGTTGAAAATCCGTAGAAAAGACTTTCCAGATAAAAAATTAACGAATTTAGCTGTTGGAAATTACTCACTTTCTTGTAGCGTAAGTAGACTATATAAGATCTAATTTTCAAAAACTCCTGCTGCTTAGTCGAGACAGAATTCTCAATCAGTCGCTTACCATCTTGCCATTACAATTATACACACTCGCCATGTTTTGGTAAGCAAATGCTACATTTCAGTGATGGACTGAATAGAGGCTATAAAGGAAAGGACAAATGAAGCATCATCATACATGAAAAAGTGAAAC…
	comp25531_c0	498	basic helix-loop-helix family protein [Arabidopsis lyrata subsp. lyrata]	Arabidopsis lyrata subsp. lyrata basic helix-loop-helix family protein, mRNA	--	--	Transcription factor bHLH92 OS=Arabidopsis thaliana GN=BHLH92 PE=2 SV=1	--	--	--	GO:0046983	protein dimerization activity	--	--	--	--	--	Bra027501|Bra027501.1	AT5G43650 (E=1e-082) | basic helix-loop-helix (bHLH) family protein	2.495997834	0.624013259980752	1.99996809114596	1.731713086	3.07971295334288	-0.830595968849096	2.703973612	31.1304720096176	-3.52517447396841	16.4310925478088	15.0683701587553	0.124905033131746	GCTGATTTTGCCTCCAACACATTCATTCTTCTCTCCAGTTCTTTCTTATATTCGTCTAATTTCCCAATTTGATCGACCGCTTTTTCAACAATCGAATTTTTGTCATTCTTAGTGGCAAATGGTAATAGAGAATGCAGAGCTAAGTAACTCTGTTTTTGTTTCATTCTTCTCGTCCTCTCTTTCATCATATGTTGTCGGCATCTCTCCTTCTCCGGCGCTAACGCATTTTTCTTCTCTTCCCAAATCTTTCTCAAAAGATTCAACATTCTCTTGTTCACGTTCACCGACGATGAAGAAGATACCATCGTCTGCTCCGTGTCCGTCACGTATGACCTAAAAGCGCTTCTGTTTAGTACACTTACGGTATTGTCAGCGTTGCCGGAGACATCACCGGCGATC…
	comp34370_c0	254	--	--	--	--	--	--	--	--	--	--	--	--	--	--	--	Bra017745|Bra017745.1	AT4G36060 (E=1e-057) | basic helix-loop-helix (bHLH) family protein	4.759894342	0	#DIV/0!	2.122030307	1.50954434130389	0.491332125932541	23.117385715	0.293439110024031	6.29977327772906	1.20773470851202	0.767363568775962	0.654321407963583	AGCAGTTGATTTTGTTATTTTTTTATTTGCTTGTGATTTTAAAATACATGACTACAGTCTACACATAGTTCACAGAATTTTACTTGGCTGGGAATTACAGAGTTTATGACTTGAAAATGTTATTTACAATACACTATCTGAAACAGCTTGAGATGATGAGTAACTATTAGATGAGCTTGCAGTGATTGCCGAGTTTCCTTTCTTCTCTTTACCAGAAACATCCTCTTGATCTGAAGAAGAGGCATGGATTTTAA
	comp25531_c1	637	transcription factor bHLH92 [Arabidopsis thaliana]	--	--	--	Transcription factor bHLH92 OS=Arabidopsis thaliana GN=BHLH92 PE=2 SV=1	Beta-catenin-interacting protein ICAT	GO:0006355	regulation of transcription, DNA-dependent	GO:0003677//GO:0003700//GO:0008013	DNA binding//sequence-specific DNA binding transcription factor activity//beta-catenin binding	GO:0005634//GO:0005667//GO:0016342	nucleus//transcription factor complex//catenin complex	--	--	--	Bra027501|Bra027501.1	AT5G43650 (E=1e-082) | basic helix-loop-helix (bHLH) family protein	1.305800353	0.731770651814163	0.835470874949796	0.846147092	3.00960959726207	-1.83059596995588	1.7025556435	15.9141380722285	-3.22453516632143	8.38014258211425	9.48696278222021	-0.178971496864623	AATGTGTTGGAGGCAAAATCAGCAACGGATCATGATAAAATGACTGGAACAAAGACTAGGTTTAGTCTACAAGAACCCTTGTCTGGGATCGATTCAATGGTAGAAATTCTTCAATGTCTTAAATCAATGGGGACAAAACTCAAAACGGTCCAAGCCAATTTCTCTCCTCACGAATTCTCTGCAACCATGAACATTGAGACTCAGGTTGAAGTGACGGTCGTCTAAGAAAATATCAGAAAAAGTATCTTCAATTAAATAATACGAGGAGAGGAGGTGGAAGAGAGAGTGGAGAGAAGACTCCAAGAAACTGAATGGAAGCTCCTCGTTCTCCCAGAAGCTTCGCGTATCGAAGACTACTGAGTTCCTTTTGTATTGACTTTCTGCTTTGTCGAAAAGAAA…
MYB	comp18071_c1	657	R2R3-MYB transcription factor [Arabidopsis thaliana]	--	myb proto-oncogene protein, plant	http://www.genome.jp/dbget-bin/www_bget?ko:K09422	Transcription factor MYB44 OS=Arabidopsis thaliana GN=MYB44 PE=2 SV=1	Protein of unknown function (DUF1227)	--	--	--	--	GO:0005634	nucleus	--	--	--	Bra029990|Bra029990.1	AT5G67300 (E=4e-075) ATMYBR1, ATMYB44, MYBR1 | MYBR1 (MYB DOMAIN PROTEIN R1); DNA binding / transcription factor	17.84972891	2.3637992706901	2.91672272878488	10.17118518	46.4614496215691	-2.19154637112139	105.76125611	83.3890707190609	0.342881000515889	46.7801279495304	111.241297740512	-1.24972476760903	ACTCGTTGCTGTTTCCGCGGTTTGGGAGTCAAATGAAAATCAATGTTGAGGAGAGAGGAGAAGCACTTGTGGGACATAAAGCTGAGTTTTTGACGGTGGTGCAAGAGATGATTAAGGTGGAAGTGAGGAGTTATATGGCGGAGATGCAAAAAAAAATAGCGGTGGTGGCGGTGGTGAATTCATCGTCAGAGGTTTCTATGATGCCGGCAACGGCTGTTTCAGGGATAGTGGGATGATAATACCGAAGGTCGAGTAGTTTTGTCATGTGAGCCAGTTAGTAGATCGAATCTATTTGGGAATTCAAGAGAAATTCATTTTTTGGGGTTTTGGTGAGATGAAAAAAATGTATAGACGGGTCGAATTGGACGATATAAGTCTCAGTAACGAGTAGCTCAAATG…
	comp26827_c0	1255	myb domain protein 77 [Arabidopsis thaliana]	Arabidopsis thaliana chromosome 3, complete sequence	myb proto-oncogene protein, plant	http://www.genome.jp/dbget-bin/www_bget?ko:K09422	Transcription factor MYB44 OS=Arabidopsis thaliana GN=MYB44 PE=2 SV=1	Myb-like DNA-binding domain	GO:0010200//GO:0009751//GO:0009723//GO:0006355//GO:0048527	response to chitin//response to salicylic acid stimulus//response to ethylene stimulus//regulation of transcription, DNA-dependent//lateral root development	GO:0003677//GO:0005515//GO:0003700	DNA binding//protein binding//sequence-specific DNA binding transcription factor activity	GO:0005667//GO:0005634	transcription factor complex//nucleus	KOG0048	Transcription factor, Myb superfamily	AT3G50060	Bra012910|Bra012910.1	AT3G50060 (E=2e-104) MYB77 | MYB77; DNA binding / transcription factor	126.2137284	102.148581508479	0.305199672161094	95.17246745	216.725447070736	-1.18725237896084	256.0278468	442.194688209167	-0.788380962023807	268.683577829584	262.791951436992	0.0319870545594359	TCGGCTTCCCCTTCTCTTCTCAAAGATCTGCTCTGAATCAATGGCGGATCGTGTAAAAGGTCCGTGGAGCGAAGAAGAAGACGAGCAGCTTCGAAGGATGGTGGAGAAATACGGGCCGAGGAACTGGTCGGCGATCAGCAAATCGATTCCAGGCCGATCTGGCAAATCGTGTCGGTTACGGTGGTGCAATCAGTTATCTCCGGAGGTTGAGCACCGTCCGTTCTCACCGGAGGAAGACGAGACGATCCTCTCCGCTCGCGCTAAGTTCGGCAACAGATGGGCCACGATCGCTCGTCTCCTCAACGGACGCACGGACAACGCCGTGAAGAACCACTGGAACTCGACGCTCAAGCGAAAATTCGTAGGCGGAGGAGGGGACTGTGATCTCGTTGCGGTGAC…
	comp35012_c0	1216	myb domain protein 2 [Arabidopsis thaliana]	Arabidopsis lyrata subsp. lyrata MYB transcription factor Atmyb2, mRNA	myb proto-oncogene protein, plant	http://www.genome.jp/dbget-bin/www_bget?ko:K09422	Myb-related protein 340 OS=Antirrhinum majus GN=MYB340 PE=2 SV=1	Myb-like DNA-binding domain	GO:0010260//GO:0009733//GO:0009414//GO:0009753//GO:0009409//GO:0009751//GO:0045893//GO:0009611//GO:0046686//GO:0009723//GO:0016036//GO:0042538//GO:0009738	organ senescence//response to auxin stimulus//response to water deprivation//response to jasmonic acid stimulus//response to cold//response to salicylic acid stimulus//positive regulation of transcription, DNA-dependent//response to wounding//response to cadmium ion//response to ethylene stimulus//cellular response to phosphate starvation//hyperosmotic salinity response//abscisic acid mediated si…	GO:0003700//GO:0005516//GO:0003677//GO:0001046	sequence-specific DNA binding transcription factor activity//calmodulin binding//DNA binding//core promoter sequence-specific DNA binding	GO:0005667//GO:0005634	transcription factor complex//nucleus	KOG0048	Transcription factor, Myb superfamily	AT2G47190	Bra004473|Bra004473.1	AT2G47190 (E=3e-135) ATMYB2, MYB2 | MYB2 (MYB DOMAIN PROTEIN 2); DNA binding / calmodulin binding / transcription activator/ transcription factor	119.3953307	36.6086923907376	1.70548826823422	144.3728345	141.28994890567	0.0311404684090972	155.38204485	31.4438346335125	2.30497073020368	87.9083345667563	47.1247054785475	0.899516351592628	GACTTCAAATCTAATCCACAAAGCCTTTCACACCATCTCTTCTGTCTCTCTTTTCCTTTTCCCTCATTAAAATAAAGAGAAATGGAAGATTACGAGCAAAACTCAAACTCTCCAGCTCATGAAGAAGATTCTGATGTACGGAAAGGTCCATGGACTGAAGACGAAGATGCTATTCTCGTCAACTTCGTTTCCATCCACGGCGATGCTCGCTGGAACCACATAGCTCGTTCCTCAGGGCTTAAGAGAACTGGTAAGAGTTGTAGATTAAGATGGCTTAACTACTTGCGTCCAGATGTTAGACGAGGCAACATCACTCTCGAAGAACAATTTATGATCCTCAAACTCCATTCTCTATGGGGCAATAGGTGGTCAAAGATTGCACAATACTTACCGGGAAGA…
	comp27932_c0	1137	myb domain-containing protein [Dictyostelium fasciculatum]	--	myb-related protein	http://www.genome.jp/dbget-bin/www_bget?ko:K09421	Myb-like protein Q OS=Dictyostelium discoideum GN=mybQ PE=3 SV=1	Myb-like DNA-binding domain//Pleurocidin family	GO:0042742	defense response to bacterium	GO:0003677//GO:0005488	DNA binding//binding	--	--	KOG0048	Transcription factor, Myb superfamily	--			1.043083057	0.40997177238841	1.34725755411831	1.042911641	0.607004109801353	0.780838743450426	2.9523160525	0.0655528003044008	5.4930459521501	0.5542322206522	0.599987873915418	-0.114442758080319	CTATTTAAGGATTGTACGTGGATCCTCCAAATTCAAAAGGATCCCAATAGGTGTTGAAGCTGACAGCTTGTCGCTGATCGTGATGCTCGGGGAACTCGTTCATCACGGGGTATACCGCTGTATTAAATCCGTTGTAGTTGTTGTATGTTTGGGGTTGTTGATATTGGAAGCTTTGAGTAACTTGCATTGAGTTGTCGTACTCAGTGTGGTGCATAAGATCAATGTTCCACACGGGATTTGTTGTGTCCATAGCAAGGGGGTCATGAGAAGTAGCTCCATGAGCGAGACTCTCATCTTCGCTCTCACTGACAGCAGTTTGTACAACTACCTCAGCGGGGGAAGTCGCAAAAGTGCGGCGATCTTCCTGGACCTGATCTTGATCTTCATTTCGGCTTTCGT…
	comp30102_c0	1196	myb domain protein 43 [Arabidopsis thaliana]	Arabidopsis thaliana myb domain protein 43 (MYB43) mRNA, complete cds	myb proto-oncogene protein, plant	http://www.genome.jp/dbget-bin/www_bget?ko:K09422	Protein ODORANT1 OS=Petunia hybrida GN=ODO1 PE=2 SV=1	Myb-like DNA-binding domain	GO:0009737//GO:2000652//GO:0010413//GO:0006355//GO:0045492	response to abscisic acid stimulus//regulation of secondary cell wall biogenesis//glucuronoxylan metabolic process//regulation of transcription, DNA-dependent//xylan biosynthetic process	GO:0003677//GO:0003700	DNA binding//sequence-specific DNA binding transcription factor activity	GO:0005634//GO:0005667	nucleus//transcription factor complex	KOG0048	Transcription factor, Myb superfamily	AT5G16600	Bra008610|Bra008610.1	AT5G16600 (E=4e-047) MYB43, AtMYB43 | MYB43 (myb domain protein 43); DNA binding / transcription factor	3.681308944	2.14361076808605	0.780175860794593	2.073060376	2.24412193882802	-0.114388935538917	3.115921139	2.80435537422631	0.15198953812578	2.43870787511316	8.39287863140331	-1.78304876555296	GTTCACAATTGCAATCTTTATTACATATGTATTTTACACCTAATCATCCACTAAATTGCAACACCACGGCCAAATCCAAATCGCCCACTTCGAAAACAAACAAAAAGAACTAATTAAAAACAACATGAAAAAAAAAACTGAAAGTAAAATGGTCATGAATATTGATCTAAACCATTCTTGAACATCCGCTTCCAACAAAACCATCATCATGATCATTCATAAACAATTCCAAGCTGCTCAAATAATTTATGTCCCACAAGTTCATCGTATCAACATTGTTGTGGAACTTGTCGTCTTTGTAAATAATATTATCCCCTGATGAATTATCGGATGAGAGCCACTTGAGGTCAATAGTCTCCATTTCATCAAGAAACTTCGAGAACTCCTCACCCGGTACTG…
NAC	comp29572_c0	1190	hypothetical protein ARALYDRAFT_333558 [Arabidopsis lyrata subsp. lyrata]	Arabidopsis thaliana chromosome 1, complete sequence	--	--	NAC domain-containing protein 4 OS=Arabidopsis thaliana GN=NAC004 PE=2 SV=2	Got1/Sft2-like family//No apical meristem (NAM) protein	GO:0006355//GO:0016192	regulation of transcription, DNA-dependent//vesicle-mediated transport	GO:0003677	DNA binding	--	--	--	--	--	Bra010895|Bra010895.1	AT1G02250 (E=1e-007) anac005 | anac005 (Arabidopsis NAC domain containing protein 5); transcription factor	278.0378639	314.338855952414	-0.177039250919861	245.5963338	125.312715205363	0.970756215504803	93.21565421	62.7916838546113	0.569998753924751	154.194008827306	84.135753591802	0.873955799835818	GACTTCGATTTCGACTTAAACACAAAAACCCTTTTCTCACCAATCTTCTCTCGAGTCCCTCTCTTTCGCATGATATCCGTCATAACTGAAAGCAAAAGGTAAACAGAGAATAGAAACAGAAGATATACTCAAAGCTTAAACCCCATTTTTATTACTTAAGAATTTTTTTTTCTTTTTATACTTAATAACTTGTACATCCTTTGTTATTTATACAGAGAGGACAAGCTTAACCTAATGGAATATATTAAGGAATTTTCTACTCAGAGAGCTTAAATGTCGTTTTCTGCAAGGAGACCAAATCTGTTCTCCAACTTAATTGTTGAATCCATACTCTGCTTGTTTTCAGCGAAGGCTGAGCTGTTGACAGTCAAGCTAGCTGTTGGTGTCTTGAGCTGAGTT…
	comp29630_c0	1501	NAC domain protein NAC2 [Arabidopsis thaliana]	Arabidopsis lyrata subsp. lyrata NAC domain protein NAC2, mRNA	--	--	NAC transcription factor 29 OS=Arabidopsis thaliana GN=NAC029 PE=2 SV=1	No apical meristem (NAM) protein	GO:0006355	regulation of transcription, DNA-dependent	GO:0003677	DNA binding	--	--	--	--	AT1G69490	Bra003998|Bra003998.1	AT1G69490 (E=2e-116) NAP, ANAC029, ATNAP | NAP (NAC-like, activated by AP3/PI); transcription factor	316.3671216	282.819313971192	0.161719029379654	217.6278619	75.9711367554534	1.51833995651037	82.067204615	38.4833369808331	1.0925719088283	128.055599440417	76.9389439271624	0.734984406229491	ATAAGAAAGAAGTGACGCACACTAAACGACATAAAGCTCAAGCATATAAACCCAACCTTCTCGCCTTTCTAACATTTCATAAACCTTGAAAACATCAAACACAAAAAGAAAAACACACTTCCTGTTTCATTAGATTCTTCTAGTTGTCCTAAGATCATGGAAATAAACTCCAATTCTACTACACTCCCTCCAGGATTCAGATTTCATCCTACCGATGAAGAGCTCATCGTTCACTATCTCCGAAACCAGACCATGTCCAAGCCATGCCCTGTCTCCATCATCCCAGAAGTAGATATCTACAAGTTCGACCCATGGCAATTACCCGATTTAACAGAGTTTGGAGAAAACGAATGGTATTTCTTCAGCCCGAGAGAGCGAAAGTATCCGAACGGAGTCCGA…
	comp32540_c0	1396	ANAC059/ATNAC3 [Arabidopsis lyrata subsp. lyrata]	Brassica rapa subsp. pekinensis clone KBrH013N10, complete sequence	--	--	NAC domain-containing protein 100 OS=Arabidopsis thaliana GN=NAC100 PE=2 SV=1	No apical meristem (NAM) protein	GO:0006355	regulation of transcription, DNA-dependent	GO:0003677	DNA binding	--	--	--	--	AT3G29035	Bra025374|Bra025374.1	AT3G29035 (E=4e-116) ATNAC3, ANAC059 | ATNAC3 (ARABIDOPSIS NAC DOMAIN CONTAINING PROTEIN 3); protein heterodimerization/ transcription factor	53.75968854	70.1805788106081	-0.384547066540016	63.37214891	25.1038521561423	1.3359401762546	23.518842195	8.91626086604536	1.39930630799644	36.1442048880227	18.3601078514942	0.97718982046822	CTGCTCTGTTTCGAAAAAAAAAGAGCTTGCCTGGTCAAACCAACTTCTCTTCTCTCTTACAAAAAAAATTAAGTTCTTCCTCTTCTTTCACATCAAGAACTCTTTCTATATCTTCTTGTTTCGTCTTTAACACCAATAAAGAATAGCTTCACCTTGGATCATTTCTGAAGGAAATGGATAGCGAGGTATCAAGAACCGGGGAGATAACAAAAGATTCGGAGCAGACTGATTTACCACCTGGCTTTAGATTTCACCCAACAGATGAAGAACTCATAAGTTACTATCTGAGACCAAAGGTTCTAAACACCTTCTTCTCCGCTATAGCCATTGGTGAAGTTGATCTCAATAAGGTTGAACCATGGGACATACCATGGAAGGCTAAGATTGAGGAAAAAGAGT…
	comp22108_c0	871	hypothetical protein ARALYDRAFT_313839 [Arabidopsis lyrata subsp. lyrata]	Arabidopsis lyrata subsp. lyrata hypothetical protein, mRNA	--	--	NAC domain-containing protein 12 OS=Arabidopsis thaliana GN=NAC012 PE=2 SV=1	No apical meristem (NAM) protein//Ubiquitinol-cytochrome C reductase Fe-S subunit TAT signal	GO:0055114//GO:0006118//GO:0015992//GO:0006355//GO:0006119	oxidation-reduction process//electron transport//proton transport//regulation of transcription, DNA-dependent//oxidative phosphorylation	GO:0003677//GO:0008121	DNA binding//ubiquinol-cytochrome-c reductase activity	--	--	--	--	AT1G32770	Bra010183|Bra010183.1	AT1G32770 (E=8e-119) ANAC012, SND1, NST3 | ANAC012 (ARABIDOPSIS NAC DOMAIN CONTAINING PROTEIN 12); specific transcriptional repressor/ transcription activator/ transcription factor	0.195484222	1.60552665398033	-3.03792254204076	0.247529597	2.20105776516182	-3.15252406520861	0.085960608	2.48159871921585	-4.85145034967439	1.36456415810793	0.223777665291727	2.6083022711122	TATATTTTCGAAATTATCTTGTGTGTGTATGTTTATGTGTATATACAATCATACAGATAAATGAAGAAGAGGGTCTAAAGACGAAGGAGACGAAGAAGATTCTGCGAAGCTACTCCAGATATCGACATTATCTTCATTATTCCAGTGAAGATCCCATCGCTGCATCATGGCATCACCATCTTCTTCTTCGTCAAAACTCGTACGATCACACGTATGATGACCATTGTTCAATTGCCATGCCACTAACCGGTCAAGACTAGCCCAATTACTGCAACCCGGTCTGCCGGTTATCTTCTCTTCAACCAAAGAGGCATCGAGTTGGTTAGTGGTCGTTAAACATTGGCCAACTAGATTTTCAGATTTGGGTGTCTCAAGACTTGGTAGTTGCATGAATAAAAG…
ERF	comp40209_c0	816	ethylene-responsive transcription factor ERF019 [Arabidopsis thaliana]	Brassica rapa subsp. pekinensis clone KBrH020D15, complete sequence	--	--	Ethylene-responsive transcription factor ERF019 OS=Arabidopsis thaliana GN=ERF019 PE=2 SV=1	Gap junction alpha-8 protein (Cx50)//AP2 domain	GO:0007154//GO:0006355	cell communication//regulation of transcription, DNA-dependent	GO:0003677//GO:0003700	DNA binding//sequence-specific DNA binding transcription factor activity	GO:0005922//GO:0005667//GO:0005737//GO:0005634	connexon complex//transcription factor complex//cytoplasm//nucleus	--	--	--	Bra024539|Bra024539.1	AT1G22810 (E=1e-055) | AP2 domain-containing transcription factor, putative	50.94215387	5.61726642302526	3.18091982338939	20.47655225	34.6773414051589	-0.760020474967417	36.9681831	19.1814241773061	0.946574298997777	19.828988213653	24.9609451054171	-0.332061495484657	AAAAAAAAAAAAAAAAAAGAATGGGAGTGTACAGAGGACGTTCATATTGTATTGTGCAACAACAATTATATATTTCAAAAGGTTTCCAGATATTTCATAGACGCAACAAAACGTATAAATTATTGTCTGAAACAAAGCTTCACTCGCATTATAATTCTCTTGAATAAAATATAAAATATAAAATATAAATATATATATTCGTACAACAAAAGAAAAAAAAAAAGGCCGACAGCGAAACATAAACGTATTTATATTCACAACGCTTTGTTTGCTGACACACCAGGCTTCATCACTGTTTCTTTTGAGTACGAAAAACAAGAAGAAGAAGTTCAAACGTGATCGTGACCGTCCAAATAATCATACACTGATATATTCAACGCACCTCCATTCTCATAATAC…
	comp91711_c0	541	hypothetical protein ARALYDRAFT_476884 [Arabidopsis lyrata subsp. lyrata]	Arabidopsis lyrata subsp. lyrata hypothetical protein, mRNA	--	--	Ethylene-responsive transcription factor ERF037 OS=Arabidopsis thaliana GN=ERF037 PE=2 SV=1	Merozoite surface protein 1 (MSP1) C-terminus	GO:0009405	pathogenesis	--	--	GO:0016020	membrane	--	--	AT1G77200	Bra015686|Bra015686.1	AT1G77200 (E=1e-061) | AP2 domain-containing transcription factor TINY, putative	0.410728425	9.47785019826587	-4.52830315920982	2.789626532	0.566985970707857	2.29868704748694	0.444547521	0.688849666784693	-0.631851518581871	1.73923809939235	1.44111161899515	0.271273367728239	GCGAAAATTGGGCTAAAATGAACAGTTTTAAAAGATGTATTACATTAGAAAAAAAAAGAAAACTAAGGAAAAAGGGGGCCAAAATTGGAAGACTCAAAAGGTTCAGGCATCGAAGTGCCAGTTTCGTCGCTGTGGTAATAAAAACATGAGTTATTAAAATACCAAGGTGAACTAGGAGGATACTCCGGGTCAACGTACACGAACTCGCTCCACATCTCATCGTAACTCGTCTCAAGACTCGGTAACTCCACTATCTCGGTCAGTTCTTCCGCCGGCGTCGATGACGCTGCTTCTTCACTTGACGGTGACAACAATGAAGACATCGTAGACGTCGAGTAGCTACTCGCTGAAGACAAGTGCATCTCCGAGACGACGACGGTGGTGGGATCCATGGCGGCG…
	comp37882_c0	1082	RecName: Full=Ethylene-responsive transcription factor ERF026	Brassica rapa subsp. pekinensis clone KBrB069A23, complete sequence	--	--	Ethylene-responsive transcription factor ERF026 OS=Arabidopsis thaliana GN=ERF026 PE=2 SV=1	60s Acidic ribosomal protein//AP2 domain	GO:0006355//GO:0006414//GO:0042254	regulation of transcription, DNA-dependent//translational elongation//ribosome biogenesis	GO:0003700//GO:0003735	sequence-specific DNA binding transcription factor activity//structural constituent of ribosome	GO:0005667//GO:0005622//GO:0005840	transcription factor complex//intracellular//ribosome	--	--	AT1G63040	Bra027615|Bra027615.1	AT5G52020 (E=6e-026) | AP2 domain-containing protein	118.7728505	19.4583136646216	2.60974650679027	58.18363911	69.384908165374	-0.254008364947208	91.938545125	123.515567202163	-0.425951140754462	90.8496031560815	121.758619994139	-0.422471794926498	GGGAAGGTCCCGTTTCTTACTATCTTTCTCTATATACACACATTTATATATATGGCTGACCCTAAAGACCCTTTCACTGAACCTAAACCTATAAGCCAAGCTTCTTCATCGTCAGTTACTATTGTCCCAGCTCATACGTGCGGTAGAAGTCTCTCAGAGTCATCCACGTGTGAACACTCTTGTCCACTTGCTACTGTCTCTTTTGCGGCTGCTTCTTCTACTACAAGTAGTAACGATAATGTCACCTTAATGGCCACTACTGAGGCCGGCCCTACCCCTCGCCGGAAAAAGCATCCGGTTTATCGTGGGATCCGTTGCCGGAGCGGTAAATGGGTCTCCGAGATCCGAGAGCCTAAGAAGACGACACGTGTCTGGCTCGGGACTTATACGACCCCTGAG…
	comp17535_c0	1417	AP2 domain-containing protein [Arabidopsis lyrata subsp. lyrata]	Arabidopsis thaliana chromosome 5, complete sequence	--	--	Ethylene-responsive transcription factor ERF025 OS=Arabidopsis thaliana GN=ERF025 PE=2 SV=1	G10 protein//AP2 domain	GO:0006355	regulation of transcription, DNA-dependent	GO:0003677//GO:0003700	DNA binding//sequence-specific DNA binding transcription factor activity	GO:0005667//GO:0005634	transcription factor complex//nucleus	--	--	AT5G52020	Bra028291|Bra028291.1	AT5G52020 (E=8e-067) | AP2 domain-containing protein	57.5442533	10.4165538238081	2.46579379935222	36.97274653	92.3822472645899	-1.3211534227293	161.07865045	229.793144499902	-0.512570467943245	133.382945514951	132.063107724049	0.0143467126682548	AAACTCGTCAGTGGACTTGCTATACACCCTATACAGTAATACAAACATAGCAGAGCATGACAACTATTCCATGTACACAACAAGTTAATGTTGCTTCTAGAATTTGATGCTTTTGTTTCCTAAAACAGACATTTATCTATCTAGAGGCATCATAAACAATTGACCAGCAAAAACAAAAACACCACACACAACTTAGCAGAATTTTTTATACACATAAAGAAACACGCAAGTCTACCAAATATTTTAATTGTGTAACTATATTAGCCTCATATAAATCATAAGTCTTTAAGGAAAAAGTAGAAAAAATATAACAATCACAGAGCGATTCAGCATGCAACATAATAGATCTTAATAACCTATTTTGAATGTCAACAACAACGACCCAAAAAGCAAAAAAAA…
	comp17256_c0	992	hypothetical protein ARALYDRAFT_495189 [Arabidopsis lyrata subsp. lyrata]	Arabidopsis lyrata subsp. lyrata hypothetical protein, mRNA	--	--	Ethylene-responsive transcription factor ERF105 OS=Arabidopsis thaliana GN=ERF105 PE=2 SV=1	AP2 domain	GO:0006355	regulation of transcription, DNA-dependent	GO:0003700//GO:0003677	sequence-specific DNA binding transcription factor activity//DNA binding	GO:0005634//GO:0005667	nucleus//transcription factor complex	--	--	AT5G51190	Bra035732|Bra035732.1	AT5G51190 (E=1e-094) | AP2 domain-containing transcription factor, putative	98.49799745	54.7970482011629	0.8459962132139	26.84111641	77.3086899978985	-1.52618591233878	17.663995495	18.9497001981319	-0.101363314514701	22.895408304066	34.2841797937422	-0.582484714469062	GACCACACAAGTCGGCCATCATTTTGTACGAAGGACTCATTAGTATCGTTTTGAAAGCTCTTATCCTCTTGAGGTCGTTTAAGGAAGAGTAGAGATAATTGCATTGAGAAGAACGAATGAATATAACAAACCATTTACAATCAACCAATCTACAAACTAATTCACTCCGTGAGGAATCTTTAATACAATCCTTAAGATAATTATTGTCTTGTTTGTGTGTTCGCTTGCCGATGATATATAATCCAAAGTTGCGGATGTCACCTACATCCATAAGCTTACTTAACTCCGAGTTGAGAATGTCCTAGCGATGGGTAAGGAGATAAAGGAGGCACAGAGAATAGTCCCATCCCTATACCGTCTACTGCGTCCCAAAACCCCATCCAACTTGATGGTGTTAAC…
	comp18082_c0	631	ethylene responsive element binding factor, putative [Brassica oleracea]	Brassica napus clone JBr38I20, complete sequence	EREBP-like factor	http://www.genome.jp/dbget-bin/www_bget?ko:K09286	Ethylene-responsive transcription factor 6 OS=Arabidopsis thaliana GN=ERF6 PE=2 SV=2	AP2 domain	GO:0006355	regulation of transcription, DNA-dependent	GO:0003677//GO:0003700	DNA binding//sequence-specific DNA binding transcription factor activity	GO:0005634//GO:0005667	nucleus//transcription factor complex	--	--	--	Bra040158|Bra040158.1	AT4G17490 (E=2e-075) ATERF6, ERF-6-6 | ATERF6 (ETHYLENE RESPONSIVE ELEMENT BINDING FACTOR 6); DNA binding / transcription factor	69.29227269	31.6926989379237	1.12854395110071	55.51570269	138.881007581057	-1.32288151717894	54.34913841	39.5949063614476	0.456942316078867	47.5553045257238	59.7318355760081	-0.328893782334764	GTGGGGGAAATTCGCGGCGGAGATCCGAGATCCGACCCGCCGCGGAACCAGGGTTTGGCTCGGGACGTTCGACACGGCGGTTGAAGCGGCTAGAGCTTACGACCAAGCGGCGTTTAGGCTCCGAGGAGCAAAGGCCATCGTGAATTTCCCGCTCGAGGTTGGGACGTGGGAACCACGCGCTGAGAATGGTCAGAAAAACAAACGGAAGCGAGACGGAGCTGGGGAGGAAGAAACGAGGGTTGTTGCGAAAGTTGTAAAGACGGAGGAGAGTCACGGCGTCGAGCAAGTGACGTCGAGTTTGACGGGGATAGATGACTGGGACTTGACGGAGTTTCTAAGCATGCCGCTTTTCTCGCCGTTGTCACCACATCCACCGTTTGGTTATCCACAATTGACTGT…
	comp18310_c0	1317	hypothetical protein ARALYDRAFT_496327 [Arabidopsis lyrata subsp. lyrata]	Arabidopsis lyrata subsp. lyrata hypothetical protein, mRNA	--	--	Ethylene-responsive transcription factor ERF104 OS=Arabidopsis thaliana GN=ERF104 PE=1 SV=1	AP2 domain//Ribosomal S13/S15 N-terminal domain	GO:0006355//GO:0006412//GO:0042254	regulation of transcription, DNA-dependent//translation//ribosome biogenesis	GO:0003700//GO:0003677//GO:0003735	sequence-specific DNA binding transcription factor activity//DNA binding//structural constituent of ribosome	GO:0005634//GO:0005667//GO:0005840	nucleus//transcription factor complex//ribosome	--	--	AT5G61600	Bra012938|Bra012938.1	AT5G61600 (E=7e-072) ERF104 | ethylene-responsive element-binding family protein	110.1559737	86.243181145358	0.353065434657915	32.24397498	79.7196395650356	-1.3059055796475	42.12895103	30.395193934528	0.470968770806425	31.319584457264	79.8518238338133	-1.35026028816363	ATTAAATGACAAAAAGTCCATGTTGAGGGAAAAAGACAAGAGGGAAAAACAGAAAAGAATAAAACGACGAAATCTAATAGATAAAGAAACAAGTCAGAAGTCCACAACAATTCCAAACAAACACAAGGTAGTATGATCGTTCTCGGTCCGATCCACGAAACTCCCTCGAACCCTCTCTTACTTTCTAAAGCTCCCACCACTATATATTACCATATTCCCCGTCGCTCTTCTTCACACTTCAATTCCACACATACACAAAGATCAAGAAGTTCAGTTAAGTTAATAAGGAGTGCTAAAGATGGCAACTAAACAAGAATCTTTAGCCATCGAATTCATAAGCCAACACCTTCTCACAGATTTTGCTTCCACAGAAACCAAACCTTCCAGTTTCACTCTTCG…
	comp20966_c1	1146	TINY-like protein [Arabidopsis thaliana]	Arabidopsis lyrata subsp. lyrata AP2 domain-containing transcription factor family protein, mRNA	--	--	Ethylene-responsive transcription factor ERF012 OS=Arabidopsis thaliana GN=ERF012 PE=2 SV=1	Prokaryotic Cytochrome C oxidase subunit IV//AP2 domain	GO:0006355	regulation of transcription, DNA-dependent	GO:0003700	sequence-specific DNA binding transcription factor activity	GO:0005667//GO:0016021	transcription factor complex//integral to membrane	--	--	AT1G21910	Bra016400|Bra016400.1	AT1G21910 (E=2e-066) | AP2 domain-containing transcription factor family protein	29.58300518	16.1344999184028	0.874619752758563	18.81311336	79.5193816425306	-2.07956791975566	79.626200595	116.148090399345	-0.544650309428556	67.4806018796725	106.010138703479	-0.651657502671443	ACACTCATCCAAAAATCTCTAGCCGTCACCAAAAACGATAAAAACAATCTCCTCATCTCTTGATAAATACCACATTGTCCAATCAAGCTACGTAGCCTCGGATCAATACACACAACACCATTACAATGGTGAAACAAGAACTCAATATCAAGAAGGAAATGTCATTGTCACCTTCGTCTTCTCCTAAGATCAAGAGCAAGAAGAATAAGATTAAGAAGTACAAAGGAGTGAGGATGAGAAGTTGGGGATCATGGGTGTCTGAGATTAGGGCACCAAATAAAAAAACAAGGATTTGGTTGGGCTCTTACTCAACAGCTGAAGCAGCAGCTAGGGCTTATGATGTTGCACTCTTGTGTCTAAAAGGCCCTCAAGCCAATCTCAACTTCCCCAGCTCTGCTT…
	comp32703_c0	1832	hypothetical protein ARALYDRAFT_910177 [Arabidopsis lyrata subsp. lyrata]	Brassica oleracea Contig G, complete sequence	--	--	Ethylene-responsive transcription factor ERF016 OS=Arabidopsis thaliana GN=ERF016 PE=2 SV=1	AP2 domain//TIR domain	GO:0007165//GO:0006351//GO:0006355	signal transduction//transcription, DNA-dependent//regulation of transcription, DNA-dependent	GO:0005515//GO:0003700	protein binding//sequence-specific DNA binding transcription factor activity	GO:0005667//GO:0005622	transcription factor complex//intracellular	--	--	AT5G21960	Bra006599|Bra006599.1	AT5G21960 (E=7e-069) | AP2 domain-containing transcription factor, putative	35.84980226	9.37195024112467	1.93554396177072	6.766867386	38.053183730342	-2.49145714161203	49.94687306	19.5284368417739	1.35481788746993	13.147652113887	24.7420172615285	-0.912157942243464	GTAAATAATAAACATGAATGCCTCTTCGTCAGTCATCACCGCGTTACCACGTATTCATCTTCCTCAACGCGCAGACAACCTAAGACCTTCTTCTTCAAATTCTCATACTCTACTTATAACACACAAATATAAATACAATAACAAGTCGCAATTCTCACTATAACTGTCAACTCGAAAAAAAAACACCTGGATTAGTACACAAAAACCATAATAACCAAAAATATATACACAAACACACTCATCTAACCCTGTCCATTTTATTTGTATAAAGAGATATGGATGCATCACCCAAGTACACAGGTGTCCGAAAGAGGAAGTGGGGAAAATGGGTCGCTGAGATTCGTCTCCCAAACAGCCGTGAAAGGATCTGGCTCGGCTCCTTCGACTCCGCTGAGAAAG…
	comp33935_c0	1847	uncharacterized protein [Arabidopsis thaliana]	Brassica rapa subsp. pekinensis clone KBrB092P05, complete sequence	protein CGI121	http://www.genome.jp/dbget-bin/www_bget?ko:K15901	Ethylene-responsive transcription factor ERF109 OS=Arabidopsis thaliana GN=ERF109 PE=1 SV=1	AP2 domain	GO:0006355	regulation of transcription, DNA-dependent	GO:0003700	sequence-specific DNA binding transcription factor activity	GO:0005634//GO:0005829//GO:0005667	nucleus//cytosol//transcription factor complex	--	--	AT4G34412	Bra017656|Bra017656.1	AT4G34410 (E=7e-078) RRTF1 | RRTF1 ({REDOX RESPONSIVE TRANSCRIPTION FACTOR 1); DNA binding / transcription factor	152.9403444	31.1162404579418	2.29722936200234	59.92394834	141.222608537703	-1.23676648025749	258.642215	270.888840289531	-0.0667431927702589	165.406394314765	237.33526906749	-0.520911499715706	AGCCCCCAAAACACAACCGAAAACAAAAACATCATCTCCAGGTGCTTGAACACTTACACAGTCGACGACAAAAAAAAAATCCAAAATTAATCAAATGCATTATCCTAACAACAGACCCGAATTCGTCGGAGCTCCAGCTTCAGACTCGACCCGGAACAGGTATCAACAGAAGGAGCAGTTGTCACCAGAGCAAGAGCTCTCGGTTATAGTCTCCGCCTTGCAACACGTCATCTCAGGTGGAAACGATACGACGCCGTATCAGGGTTTCTCAAGCAATAGCACAGTGATTAGCGCGGGAGTGCATTCCGACACGTGCCAAGTGTGCAGGATCGATGGTTGTTTAGGCTGTAACTACTTTTCCGCGCCAAATCAGAGAATCGAAAATAAACAACAAGTAGA…
	comp38923_c0	1011	ethylene-responsive transcription factor ERF017 [Arabidopsis thaliana]	Arabidopsis thaliana chromosome 1, complete sequence	--	--	Ethylene-responsive transcription factor ERF017 OS=Arabidopsis thaliana GN=ERF017 PE=2 SV=1	AP2 domain	GO:0010200//GO:0006355	response to chitin//regulation of transcription, DNA-dependent	GO:0003677//GO:0003700	DNA binding//sequence-specific DNA binding transcription factor activity	GO:0005667//GO:0005634	transcription factor complex//nucleus	--	--	AT1G19210	Bra031069|Bra031069.1	AT1G19220 (E=6e-056) ARF19, IAA22, ARF11 | ARF19 (AUXIN RESPONSE FACTOR 19); DNA binding / transcription factor	35.40637322	8.45287991635648	2.06649421185591	7.143958805	42.9306228369111	-2.5872114371145	110.81740725	38.7036201645549	1.51764409732372	22.9237894847774	115.085787660461	-2.32779222321056	GATACTATAAATTATAAGTTATTTTATAACAAAATGTATTTTAACCTGAGGTTCAATCCAAACTATAAGCTTGGCCTTTTTTCATCGTGCTTCTTCTGATAACACGTGTGGCAAAATCTGGATACCACTGTTGGGCCATGGCTACGAATATACTAATAATTTTTTTTTTGATTTTTAAACAGACAAACAAACAAAAAATCAAGGAAGATAATGAATCACTATCGAAATAATGATCCCAAAAAAATGGGCACAGAATTACAAATAAATAAATAAATCCAATTTAAAATTAAAATTAAAATTCTAGAAGCGAAGTTGATAAGGCCGTCTTGCCCAAAAAACAAACTTCAAAAATTCCAAAGATGCACCGCCGAGCCATCGTAACTCTCATAATCCCTTGTA…
	comp39325_c0	1115	ethylene-responsive transcription factor ERF013 [Arabidopsis thaliana]	Brassica rapa subsp. pekinensis clone KBrB047M06, complete sequence	--	--	Ethylene-responsive transcription factor ERF013 OS=Arabidopsis thaliana GN=ERF013 PE=2 SV=1	AP2 domain	GO:0006355//GO:0009741	regulation of transcription, DNA-dependent//response to brassinosteroid stimulus	GO:0003677//GO:0003700	DNA binding//sequence-specific DNA binding transcription factor activity	GO:0005634//GO:0005667	nucleus//transcription factor complex	--	--	AT1G77640	Bra015660|Bra015660.1	AT1G77640 (E=7e-069) | AP2 domain-containing transcription factor, putative	24.60506242	11.2569865418565	1.12813450201061	11.60170112	44.1594709576248	-1.92838652976221	62.701817445	43.9273242128633	0.513388639060816	27.7645126664316	56.2006066276357	-1.01734362953141	GCTCTATATAATCTCCTCTCCTCAACATTATTTTCCATCAAAAATACTTTTTCTCACATTAACATTTATATCAAACACACAACATTATCATACAATATGGTGAAACAAGAACGTAAGATCCAAGTTACCACTTCCTCATCGTCACTGTCTCAATCTTCTTCTTCTACTTCTTCCTCGTTGGCATTGCATCATCAATCTTGTCAGGACAAGATAAAGAAATACAAAGGAGTAAGAATGAGAAGCTGGGGATCATGGGTCTCTGAGATTAGGGCACCAAATCAAAAGACAAGAATCTGGTTAGGTTCTTACTCAACCGCAGAAGCAGCTGCTAGGGCTTACGATGCTGCTCTCTTGTGTCTTAAAGGCCCTAAAGCCAATCTCAACTTCCCAAGCACTACT…
	comp37435_c0	1279	ATERF#011/CEJ1 [Arabidopsis lyrata subsp. lyrata]	--	--	--	Ethylene-responsive transcription factor ERF011 OS=Arabidopsis thaliana GN=ERF011 PE=2 SV=1	AP2 domain	GO:0006355	regulation of transcription, DNA-dependent	GO:0003677//GO:0003700	DNA binding//sequence-specific DNA binding transcription factor activity	GO:0005634//GO:0005667	nucleus//transcription factor complex	--	--	--	Bra036061|Bra036061.1	AT3G50260 (E=4e-060) CEJ1, ATERF#011 | CEJ1 (COOPERATIVELY REGULATED BY ETHYLENE AND JASMONATE 1); DNA binding / transcription factor	334.5379695	231.863821505693	0.528892234664002	235.1521497	107.589027981795	1.12806356283964	137.81061775	69.4741114150633	0.98813966377735	152.313130557532	97.6837623820872	0.640849645274077	GAAAACTTTATTCATTTTCATATAAACATAACCTTTTAGCAGGTTTGGTGTAAACGAACAAAAATAATCAAACAACGCTTAGTTTAGTGTTTGATTATGCCAACATTATACACAGATATACGTTATTTATAAAATAATATTACTGGAAAATTTGATCATAATGAATTCAAGGGATTAAGAATCTTTTTTAATGAGTTTGATGACTATACGCTTCATCTCAGGTCTCATCCGATTTTATTTTCCTTTTTCAGAAAAAAAAAACGAAATTCAACTATAAATAACGCGAGTCGTCTTGTAGTTTGGAATTTTCTCCACCAACTACAACTGCAAGTTTGCAACATATCCCTCTCTCTCCTTCCCTAACCTACCAAAATCAGGTAGTAATATGCTACAACACGG…
	comp42791_c0	722	ethylene-responsive transcription factor ERF020 [Arabidopsis thaliana]	Arabidopsis lyrata subsp. lyrata hypothetical protein, mRNA	--	--	Ethylene-responsive transcription factor ERF020 OS=Arabidopsis thaliana GN=ERF020 PE=2 SV=1	AP2 domain	GO:0010200//GO:0006355	response to chitin//regulation of transcription, DNA-dependent	GO:0003677//GO:0003700	DNA binding//sequence-specific DNA binding transcription factor activity	GO:0005634//GO:0005667	nucleus//transcription factor complex	--	--	AT1G74930	Bra007974|Bra007974.1	AT1G71520 (E=3e-056) | AP2 domain-containing transcription factor, putative	21.14374713	3.12049844205056	2.76038267967075	11.79519671	5.841643891417	1.01375316000351	46.547640255	6.09069044711928	2.93403034387668	8.94294357855964	4.85926071529598	0.880012934191118	GGAACTTAATTTAAATTTACACAACCAAACAAACAAATTTGTAACCGAATTATGAATCAACCGTGTTAACGTATAAAAGAATTTATTTTTTATTGATGAAAACTACATCATGAAAAAAGAAGCATGCGAAATGAAATCTCTTTTTGCGAAATAAAAGAAGTAAAAAAATAAATTCTATTCACATCCAATATTAATTGCCAACATAAGGTGCTAAAATGCGATCGTCATCTAGATAATCGTACACGGAGATGCTCAACGCTTCCCTTTCGCTGTATTCCGCCATGTTCGCCGTCGATGATCTATATTCGCCGCCACCATTCACACCGTCTTTCTTAACGGCGAATCCAGCGTCGATGGCCATGCCGGCGTCTGATGCAGCTTTTTGGATGGACTTAGGAG…
	comp28628_c0	655	ethylene-responsive transcription factor ERF018 [Arabidopsis thaliana]	--	--	--	Ethylene-responsive transcription factor ERF018 OS=Arabidopsis thaliana GN=ERF018 PE=2 SV=1	--	GO:0009611//GO:0006355//GO:0009607	response to wounding//regulation of transcription, DNA-dependent//response to biotic stimulus	GO:0003700//GO:0003677	sequence-specific DNA binding transcription factor activity//DNA binding	GO:0005634//GO:0005667	nucleus//transcription factor complex	--	--	--	Bra015882|Bra015882.1	AT1G74930 (E=6e-053) ORA47 | ORA47; DNA binding / transcription factor	5.680073028	3.55830461989024	0.67471945605048	0	11.1222305208131	#NUM!	14.221401075	19.4583729844027	-0.452327479432902	9.72918649220135	44.040811110574	-2.17844995568153	GAAGGCGGCGCGTGCCTTCGACGCCGCCCAGTTTTGTCTCCGCGGCTGCCAATCCGGTTTCAATTTCCCCGATAATCCGCCGTCGATCTCCGGCGGAAGGTCGTTATCGCCTCCGGAGATCCGGGAAGCGGCTGCTCGATACGCAAACGCTCAGGACGACGGTATTCTCATCACCACCGGAGAAGAAGAATCGGTTTTGTCCGAAACCCGACCGGAGTCTCCTTCAACAACCTCCGTGTCTGAAGCAGCTACGTCGCTGGATTGCGATCTATCGTTCTTAGACACGCTTCCTAATGATTTCGGGATGTTTTCTGTGTTTGATGACTTCTCCGACGGCTTCTCCGGCGATCAGTTTACAGAGGTTTTACCCGTTGAAGATTACGGAGATGTGATTTTTGA…
	comp19799_c0	537	ethylene response factor 56 [Brassica napus]	Brassica napus ethylene response factor 56 (ERF56) mRNA, complete cds	--	--	Ethylene-responsive transcription factor ERF104 OS=Arabidopsis thaliana GN=ERF104 PE=1 SV=1	--	GO:0006355	regulation of transcription, DNA-dependent	GO:0003700//GO:0003677	sequence-specific DNA binding transcription factor activity//DNA binding	GO:0005634//GO:0005667	nucleus//transcription factor complex	--	--	--	Bra029319|Bra029319.1	AT5G61600 (E=7e-073) ERF104 | ethylene-responsive element-binding family protein	36.0426046	14.1779995996744	1.34604927611231	8.631960897	30.5596991493163	-1.82387010605341	20.5616770535	12.352857581384	0.735113120104928	10.492409239192	49.918100465353	-2.25021705257263	AATCTTGAATTTCCCTCTAGATGTGAGGGCTACGTCAGAAAGTTGTTTCGTCGGATTAGGGAAACGAAAGCGGCTTAAGAGCTTCGTGGCGGAGGAAGAGACGGTGCCGGTTAGGGCTAAAGCTGAGGAAAAGGAGAGTGATACCACGGTGGCTGAGGTTGAAGCGGTTCCTTTGACGCCGTCAAGCTGGAAAGGGGTTTGGGACTTGGGAGCAGGAGACGGGATATTCAGTGTTCCTCCGTTAACTCCGACGTCTCCCAGCTCCGCTACTTGAAACTTCTGAATTGTCAACGGTTGGTGGTGACGCTTTCACCTGCTTCACTCTCATAATTTCTTTATTCTTTATAGTATACTAATACAAGCGGTAGTGTACAAACATCAGATTAGTGTTTTACTACC…
	comp28146_c0	955	DNA binding protein [Arabidopsis lyrata subsp. lyrata]	Arabidopsis lyrata subsp. lyrata DNA binding protein, mRNA	--	--	Ethylene-responsive transcription factor ERF027 OS=Arabidopsis thaliana GN=ERF027 PE=2 SV=1	AP2 domain	GO:0006355	regulation of transcription, DNA-dependent	GO:0003677//GO:0003700	DNA binding//sequence-specific DNA binding transcription factor activity	GO:0005667//GO:0005634	transcription factor complex//nucleus	--	--	--	Bra016761|Bra016761.1	AT1G12630 (E=5e-057) | DNA binding / transcription activator/ transcription factor	1.158883689	0.406752098783265	1.51051408284039	5.531055329	6.42386199273195	-0.215886125109845	10.9797849	2.70974272105625	2.01862200620947	4.12039902502813	3.87779746901863	0.0875466008935885	GGCACCAATACAAGATCCTACCAAATGGCCCTCTTACCTCAAAAATTCTTCTTCTCCTTTGATTAATTTGCCACCACAGAGCGAGTGAATATAAATACCTCTGGTTTGGCCACGTGTGAAAACCCTTTTTCTTCTCTTGCTACTCACTATACTACTACTACTCCTACTCATATATAGTTGTTAATATATACTCAATGGCTACTAACGGCTTAGCTAGCCGGAAAAAAGATCCAGTATACCGAGGCATCCGGTGCCGGAGCGGGAAATGGGTGTGCGAGATCCGCGAGCCGAAGAAGACCACTCGAATCTGGCTCGGAACTTACCCCACGGCAGAGATGGCAGCTGCTGCCTACGACGTGGCTGCTATAGCTCTCAAAGGCCGAGAAGCCCTCTTGAACT…
	comp44341_c0	309	ethylene-responsive transcription factor ERF018 [Arabidopsis thaliana]	Brassica rapa subsp. pekinensis clone KBrH015N11, complete sequence	--	--	Ethylene-responsive transcription factor ERF018 OS=Arabidopsis thaliana GN=ERF018 PE=2 SV=1	AP2 domain	GO:0009611//GO:0006355//GO:0009607	response to wounding//regulation of transcription, DNA-dependent//response to biotic stimulus	GO:0003700//GO:0003677	sequence-specific DNA binding transcription factor activity//DNA binding	GO:0005634//GO:0005667	nucleus//transcription factor complex	--	--	AT1G74930	Bra003780|Bra003780.1	AT1G74930 (E=3e-052) ORA47 | ORA47; DNA binding / transcription factor	4.343609673	2.51422818341759	0.788778874840589	0	5.45976296388747	#NUM!	7.2840083875	15.1961574064872	-1.06090207238873	7.5980787032436	37.8750542192128	-2.31754139277253	GGAAATGGGGGGAGATAACATAAATAACTGCAAACTAAAACGAAGAGAGAAATTTATAACCGAAACAGAGTCCAAATCAAAATCAAACCGAATCGGTTGTGCACTTATATCTTCTTGTTCAAAATGGTGAAGAAAGCGATGAAGGAGGAAGAGGAAGAGAATCGAAACTCATCGATGCAGTCAAAGTACAGAGGCGTGAGGAAGAGGAAATGGGGGAAGTGGGTGTCGGAGATCAGACTTCCACACAGCAGAGAACGCATCTGGTTAGGCTCTTACGACACTCCCGAGAAGGCGGCGCGTGCCTTCGAC
	comp18082_c1	450	ethylene responsive element binding factor, putative [Brassica oleracea]	Arabidopsis thaliana chromosome 4, complete sequence	EREBP-like factor	http://www.genome.jp/dbget-bin/www_bget?ko:K09286	Ethylene-responsive transcription factor 6 OS=Arabidopsis thaliana GN=ERF6 PE=2 SV=2	--	--	--	--	--	--	--	--	--	AT4G17490	Bra040158|Bra040158.1	AT4G17490 (E=2e-075) ATERF6, ERF-6-6 | ATERF6 (ETHYLENE RESPONSIVE ELEMENT BINDING FACTOR 6); DNA binding / transcription factor	47.84915747	20.8898838999556	1.19568904756148	30.87606911	79.7522466397672	-1.36903606841474	31.29303685	22.6913203347027	0.463701115286519	26.7836947223513	41.1477398101421	-0.619458198117252	GCCGCGAATTTCCCCCACGGCCTCATCCTCACCCCTCTGTAGTGCCTCTTCTCTTCTGCCGCCACCTGTGGTACGGGAACCTGTTCCCGCTGAGGCTTTCCGGCTGCGAATTGGATCCACTCGGTTCTGTTCGGCGGTGCGATCTTCAGCGGCGGCTTTCGATTCGATTGGAACGTGAAGGAATCGTTTGGTGCAAGTGGAGTATCGGTTATTTCCGGTTTAGTCTCGAATTCAGGAAAATCGAAACCGGTTTGGTCAAATGAACCGAAGAATGAAAAATCGGAGCTGGTTTCCCATGGATTGGTGGTGGTGGCATTAGGCAACGGGGAGAATTCGTCGAGGAGATGTTTCTTGATGAAGAAAAGAGCTGATGTTTCGCTTGGCGTGGCCATTAGAGAA…
	comp42677_c0	1036	AP2 transcription factor/ethylene response element [Brassica oleracea]	Brassica oleracea clone BAC Bo37N21, partial sequence	--	--	Ethylene-responsive transcription factor ERF106 OS=Arabidopsis thaliana GN=ERF106 PE=2 SV=1	AP2 domain	GO:0006355	regulation of transcription, DNA-dependent	GO:0003700//GO:0003677	sequence-specific DNA binding transcription factor activity//DNA binding	GO:0005634//GO:0005667	nucleus//transcription factor complex	--	--	AT5G07580	Bra009250|Bra009250.1	AT5G07580 (E=4e-083) | DNA binding / transcription factor	56.85760483	69.2150297821327	-0.283732021990239	15.08771741	10.2147776547073	0.562716758744556	4.370239389	15.1081487728589	-1.78954268181705	15.0979330914295	12.7933432045351	0.238957733990961	GACAAAACCATAAGAGTTTGTGTCCCTACACCATCCCTGGCTGCTGAAACTTTGTGATTACCTTCTTGTCTCCTCTTCTTTACCTTTTATATATAGAAAGCAAAATATCAAAGCTTTTGTTCAAACATCATTTGCAGACTCTGTCTCTCTCTCTCTCTCTCGTTTTTTCCTCTCTCACCTGCCTTGTCTAGAAGAAAAAAAATGGCTGCGTTTGAGGAAAGCTCTGATTTGGATGCTATACAGGAGCATCTCTTGGAAGACTTTTTGGTTGCTGATGGTTTCATGGGAGATTTTGACTTTAATGCTTCTTTTGTCTCAGGACTCTGGTGTATAGAGCCTGTGATGAATCAAGTTCCTAAACAAGAACCTGATTCACCAGTTCTTGATCCGGATTCGTTC…
CxHy zinc finger	comp17885_c0	1207	C2H2 zinc finger protein [Brassica carinata]	Brassica carinata C2H2 zinc finger protein (ZF2) mRNA, complete cds	--	--	Zinc finger protein ZAT6 OS=Arabidopsis thaliana GN=ZAT6 PE=2 SV=1	NADH-ubiquinone oxidoreductase-G iron-sulfur binding region//Zinc finger, C2H2 type	GO:0055114	oxidation-reduction process	GO:0003676//GO:0016491//GO:0008270	nucleic acid binding//oxidoreductase activity//zinc ion binding	GO:0005622	intracellular	KOG1721	FOG: Zn-finger	AT5G04340	Bra009464|Bra009464.1	AT5G04340 (E=2e-071) C2H2, CZF2, ZAT6 | ZAT6 (ZINC FINGER OF ARABIDOPSIS THALIANA 6); nucleic acid binding / transcription factor/ zinc ion binding	462.1781378	226.595029583537	1.02833280263633	285.1747197	202.0401260669	0.497204247675327	185.7141946	48.5375711286798	1.93591026685046	166.85614541434	91.8839992882475	0.860719265762921	ATAAGGTTGTAATCGATGTTCTTTAGAAACTGAAACGTACTTGAATTGTTTTAGAAAGGTTTTTTTTTCTTTAAACGACTTCAGGTAAAGTATCTTTTTGATGTCAAAAAAAAAAAAAAAAACGACTTCAGGTAAAGAAGACAAGAAAACTACACAAATATTACAAGAAGGAATACTACAGATTCAATAAAGAATAACAAGAAGTGGAATCTAAAAATTGGTATATGTACAGTATAACAAATTCATGTAACTGCTAGCTGAATCTGTAACGCCTTATAAGTTCTACTCGAGCCTCAGCTTCTTGGCCGGCATGGGGCTCATCACCTCTTCTTCTCCATTGACCGTCGAGAACTCCGGTATCGGCGGGATGTTGAGGTCAAACCCACGGTGGTGGTGGTG…
	comp40496_c0	975	Cys2/His2-type zinc finger protein 3 [Arabidopsis thaliana]	Brassica rapa subsp. pekinensis clone KBrB061E18, complete sequence	--	--	Zinc finger protein ZAT10 OS=Arabidopsis thaliana GN=ZAT10 PE=2 SV=1	Zinc finger, C2H2 type	--	--	GO:0008270	zinc ion binding	GO:0005622	intracellular	KOG2462	C2H2-type Zn-finger protein	AT5G43170	Bra033666|Bra033666.1	AT5G43170 (E=7e-062) AZF3 | AZF3 (ARABIDOPSIS ZINC-FINGER PROTEIN 3); DNA binding / nucleic acid binding / transcription factor/ transcription repressor/ zinc ion binding	80.77553239	60.8768136029222	0.408025506618548	33.27952924	45.5390047380919	-0.45246773570941	25.5219865	19.7227197518921	0.371882113161652	26.5011244959461	34.9839083406067	-0.400637896188424	TTCAATTTGGCCACCCACTCTCACTCTTTCAACAACACTTTCTCACCTCTTCCTTCTCACGCAACTTCCTCTACAAAACTCTTTTAAGACATCTCTGTACACACTCGTTTCTTTTAGTTATCTCTCTGCTGCCTAGTAAGGTCTTTAGTTCTGCTAACTATGGCGCTTGAAGCTCTAAATTCACCGAGGATAGCTTCTCCAGTTCCGACTCTGTTCGAGGAGCACTGGACCAAAGGTAAGCGGTCCAAAAGATCCAGATCTGATCATCCTCACCGTCTCACTGAGGAAGATTACCTCGCTTTCTGCCTCATGCTTCTTGCTCGCGACGGCGATCGCCATCACGTGGAGGAGGAAAAGACTGTTTACAAGTGCGGCGTTTGTGACAAGGTGTTTCTTTCT…
	comp38040_c0	816	C3H4 type zinc finger protein [Arabidopsis thaliana]	--	--	--	E3 ubiquitin-protein ligase RING1-like OS=Arabidopsis thaliana GN=At3g19950 PE=2 SV=1	Anaphase-promoting complex subunit 11 RING-H2 finger	GO:0002679//GO:0009737//GO:0010200//GO:0009414//GO:0051865//GO:0009612//GO:0016567//GO:0009873//GO:0009693//GO:0009611//GO:0035556	respiratory burst involved in defense response//response to abscisic acid stimulus//response to chitin//response to water deprivation//protein autoubiquitination//response to mechanical stimulus//protein ubiquitination//ethylene mediated signaling pathway//ethylene biosynthetic process//response to wounding//intracellular signal transduction	GO:0008270//GO:0004842	zinc ion binding//ubiquitin-protein ligase activity	GO:0005634//GO:0005680//GO:0005737	nucleus//anaphase-promoting complex//cytoplasm	KOG0800	FOG: Predicted E3 ubiquitin ligase	--	Bra019382|Bra019382.1	AT3G46620 (E=3e-139) | zinc finger (C3HC4-type RING finger) family protein	87.55659489	40.8870350062407	1.09857240149714	32.41900595	100.614097638497	-1.63392070396272	146.29188135	89.6530632035775	0.706424925491112	61.0360345767888	127.307985859189	-1.06058977989071	TGTGTAAACTAAATAAACAACTGTAGGGTTTAGGGACCTATGATGAAATTGAGAGCTCAGTTTCGTTTCCAGAATAAATGAAACTATTTCAATTTCTTCGAATTAGAAAAACAAGTTGATTGATCCTAAATAAGCCAACGAAACAATGAAAAACTAAAGAAAGAATTTTTAATAACAATAAAGAATTTGACATTATGTTACCATAAATTTTGATGAAACTGACTAAAAGGTTAATCGAATTACAAAAGAGAAAAAAAGTACTATTTAGGTTCCAACTGGTCTTCTATTGTTGAATCAAAACGAAAACAAAAATTTGAACATTTTTCACCTAACCATCAAGTCAGAAAAATCTTCTGATCAACGACGTCGATCGATTCATAACGTTTGTATCCAAATCAA…
	comp37878_c0	811	C3H4 type zinc finger protein [Arabidopsis thaliana]	Arabidopsis thaliana chromosome 3, complete sequence	--	--	E3 ubiquitin-protein ligase RING1 OS=Gossypium hirsutum GN=RING1 PE=2 SV=1	--	GO:0035556//GO:0009611//GO:0009693//GO:0016567//GO:0009612//GO:0010200//GO:0009737//GO:0009873//GO:0051865//GO:0002679//GO:0009414	intracellular signal transduction//response to wounding//ethylene biosynthetic process//protein ubiquitination//response to mechanical stimulus//response to chitin//response to abscisic acid stimulus//ethylene mediated signaling pathway//protein autoubiquitination//respiratory burst involved in defense response//response to water deprivation	GO:0004842//GO:0008270	ubiquitin-protein ligase activity//zinc ion binding	GO:0005634//GO:0005737	nucleus//cytoplasm	--	--	AT3G46620	Bra019382|Bra019382.1	AT3G46620 (E=3e-139) | zinc finger (C3HC4-type RING finger) family protein	73.59251797	32.7417333785922	1.16842839582582	22.99537749	71.6733886855538	-1.64009368503881	104.2011768	66.7208388526903	0.643162238440847	44.8581081713452	109.350472369551	-1.28551876936667	GCACACGGCGCAATTCGCCTCCGCTTTGATGTGGAAGTCTCCCATCTCGACTCGAGGTAAAGATTCAATCGCTGATTTCGACGCCGGAGGGTTCCCAGATCTCCCGATTCCGTTGCCCGACGCTTCGATCTGGCTCAATTGCTCAAGCAACCGCTCGAATCCAGATCCCATCAAGATCTCCGATACAGAATCCGGGAGCGGCCTAAGACCCGAACCGGATCCATCGTCGTAATAGAATTCATAAGGGCGTCGATCTCCTTCTTCGTTCTCAACTCTCTCACCACTGGCTCCTCCGTGTAAGACGATTACCGGATTAAACGAAGTGCGCCGATTCGATCTCCGCCGTCTAATTACAGATCTATGACTATCCTCGACCTGAGACACCGGAGTGGTCGTCGT…
HSF	comp28542_c1	1638	heat shock transcription factor A2 [Brassica napus]	Brassica napus cultivar Deyou No.5 heat shock transcription factor A2 (HsfA2) mRNA, complete cds	heat shock transcription factor, other eukaryote	http://www.genome.jp/dbget-bin/www_bget?ko:K09419	Heat stress transcription factor A-2 OS=Arabidopsis thaliana GN=HSFA2 PE=1 SV=1	Anenome neurotoxin//Valyl tRNA synthetase tRNA binding arm	GO:0009098//GO:0009099//GO:0006438//GO:0006950//GO:0006355//GO:0009097//GO:0009966	leucine biosynthetic process//valine biosynthetic process//valyl-tRNA aminoacylation//response to stress//regulation of transcription, DNA-dependent//isoleucine biosynthetic process//regulation of signal transduction	GO:0043565//GO:0000166//GO:0004832//GO:0005524//GO:0003700	sequence-specific DNA binding//nucleotide binding//valine-tRNA ligase activity//ATP binding//sequence-specific DNA binding transcription factor activity	GO:0005576//GO:0005634//GO:0005737//GO:0005667	extracellular region//nucleus//cytoplasm//transcription factor complex	--	--	--	Bra000557|Bra000557.1	AT2G26150 (E=2e-155) ATHSFA2, HSFA2 | ATHSFA2; DNA binding / transcription factor	35.19662569	1.99204232993855	4.14311691451134	13.68877963	14.7939031758749	-0.112008904228603	33.2197681	104.820176311505	-1.65780253345145	59.2544779707525	122.381802891657	-1.04639296740599	CTTCATTCGTCAGCTCAACACTTATATCGGTGGTTAGTCCTCAGCTTAAAAGGTTAGCTCTTTGTGCTTTCTGACAACTAAAATATCAAATGGGTTTCTCAAAGTTTGCTCCTTGGTTACATCAGACCTATCTTCTGCTTTAAATGTGACAAGAATCTATAGAATATGGCATGTAAACGAATCAGTTAAGTGCATGTTTCTTTTTTAGTTTTGCCGCCTTGTCTTTTGATCTAGTTCCGGTTCTGCTGTTTTGAAACTTAGAAATAGAATCTTAGACGGTAAGGAAGGATTCTTCTGTCCCCGTTCTGAAGAAACTTGTCCTTGTATTGCAGGGATTCAGAAAGATCGATCCGGACAGATGGGAGTTCGCGAACGAAGGGTTTTTGGCGGGGCAGAAGC…
	comp28542_c0	396	heat shock transcription factor A2 [Brassica napus]	Brassica napus cultivar Deyou No.5 heat shock transcription factor A2 (HsfA2) mRNA, complete cds	heat shock transcription factor, other eukaryote	http://www.genome.jp/dbget-bin/www_bget?ko:K09419	Heat stress transcription factor A-2 OS=Arabidopsis thaliana GN=HSFA2 PE=1 SV=1	HSF-type DNA-binding	GO:0006355//GO:0006950	regulation of transcription, DNA-dependent//response to stress	GO:0043565//GO:0003700	sequence-specific DNA binding//sequence-specific DNA binding transcription factor activity	GO:0005667//GO:0005634	transcription factor complex//nucleus	KOG0627	Heat shock transcription factor	--	Bra000557|Bra000557.1	AT2G26150 (E=2e-155) ATHSFA2, HSFA2 | ATHSFA2; DNA binding / transcription factor	43.69446581	3.13897579263045	3.79908475632912	18.23874331	18.2029700469554	0.00283246428417399	41.87083938	135.139084276016	-1.69042723930817	76.688913793008	167.101168248125	-1.12363187885903	AGTGTTGAGCTGACGAATGAAGCTGGAGAAATTGCTATGCTTGAAGTAGCGAGGAAGGAGAGTGGTGGAGAATTTGTGAGAATCCCAAACGATGAAACTGTTACGACCACTGCTCCAAGACACCACCGTGTCCGTTGCCGGATCCTCCACCATGTCGTAAGTCTTTGTCAGAAACGGCGGTGGCCCTGTCTCGTTAAGCCCTTCCATTGGTCTCGGTGACGATGACGAACCAACAGACGAAGAAGCAGCCGCTGAGCCACCGTAGGTCACCGTCTCTTCCTCCAATTCCACTTTCAGTTGTTCCATTTCTAATCCATAGGCCAAAAGACTGACTCTGTTTCGTTGCAAGAACTTTTGGTTTGGGAAAGTTTTGTGCAAGTGTTAGACAGAGTTTGA
	comp26429_c1	705	heat stress transcription factor B-2a [Arabidopsis thaliana]	--	heat shock transcription factor, other eukaryote	http://www.genome.jp/dbget-bin/www_bget?ko:K09419	Heat stress transcription factor B-2a OS=Arabidopsis thaliana GN=HSFB2A PE=2 SV=1	--	GO:0050794//GO:0008152//GO:0010200	regulation of cellular process//metabolic process//response to chitin	--	--	--	--	--	--	--	Bra029292|Bra029292.1	AT5G62020 (E=8e-055) AT-HSFB2A, HSFB2A | AT-HSFB2A; DNA binding / transcription factor	11.75523865	0.881584690696211	3.737060847293	6.880796143	5.00355066206941	0.459623265911664	17.872562065	21.9900355472193	-0.299103474112092	14.4354158451097	8.98522873793697	0.683985532138285	AGGAGAGGAGAGAAACGTCTTCTCCGCGACATCCAGCGTCGGAAACTGATCCCTCAAGGAGCTGTTTCTCCGCCGCGCCCTGAAGTTGTCGCGGCTAAAACAGCGAAAACGGTTGTGTCTCCTTCAAGTTCAGGTGAAGATCAAACCATGTCTCCGTCGTCGTGGACAGGAAGCGGTGGCTTGTCTGAAGAGCTGTTGGAGGAGAACGAGAAACTTTGGAGTCAGAACAAAGAGCTTAACCGTGAGCTTGCTCAGATGAAGTCCCTCTACGGTAACATCTTTGGACTCATGTCCAACTACGCAGGAGCTAGCAGCAGTCACGAGATGATGATGGAGATTGAGGAAGAAGCGAGCCCGAGGCTGTTTGGTGTTTCGATAGGTCTGAAACGGACCAGAAGT…
	comp17181_c0	890	heat stress transcription factor A-6b [Arabidopsis thaliana]	Brassica rapa subsp. pekinensis clone KBrB037A01, complete sequence	heat shock transcription factor, other eukaryote	http://www.genome.jp/dbget-bin/www_bget?ko:K09419	Heat stress transcription factor A-6b OS=Arabidopsis thaliana GN=HSFA6b PE=2 SV=1	--	GO:0009407	toxin catabolic process	GO:0003700//GO:0003677	sequence-specific DNA binding transcription factor activity//DNA binding	GO:0005634//GO:0005667	nucleus//transcription factor complex	--	--	AT3G22830	Bra001885|Bra001885.1	AT3G22830 (E=3e-136) AT-HSFA6B, HSFA6B | AT-HSFA6B; DNA binding / transcription factor	1.943388418	5.41208803796789	-1.47761103172899	1.211226287	1.72325511321882	-0.508667874771412	0.81297079	3.01483957534802	-1.89080581357054	2.11303293117401	6.46051148408796	-1.61233313726475	GAGGGCAAAAGCATCTCCTCAAGAAAATAACTAGAAGAAAGACGAATAACAATAATCAAATGCAACCACCTGAATCATCCTCTCAACAACAATCACTAGACAATCGTTGCATAAAAGTTGGTAGGTATGGTCTAGATGGAGAGATGGACAGCCTAAGGCGAGACAAACAAATGCTGATGATGGAGCTAGTGAAACTTAGAAAAGAACAACAAAGCACCAAAATGTATCTCACATTGACTGAAGCAAAGCTTAAGAAGACTGAATCAAAACAACATCAAATGATGAGCTTCCTTGCTCGCGCAATGCAGAATCCTGATTTCCTTCAGCATCTCATGGAGCACAAAGATAAGAGTAAGGATATGGAAGAAGCAATCAGAAAGAAGAGACAAAGAACGATCG…
	comp108651_c0	2382	hypothetical protein FOXB_14063 [Fusarium oxysporum Fo5176]	Gibberella zeae PH-1 hypothetical protein partial mRNA	heat shock transcription factor, other eukaryote	http://www.genome.jp/dbget-bin/www_bget?ko:K09419	Flocculation suppression protein OS=Saccharomyces cerevisiae (strain ATCC 204508 / S288c) GN=SFL1 PE=1 SV=3	Flavivirus envelope glycoprotein M//HSF-type DNA-binding	GO:0019058//GO:0006355	viral infectious cycle//regulation of transcription, DNA-dependent	GO:0043565//GO:0003700	sequence-specific DNA binding//sequence-specific DNA binding transcription factor activity	GO:0005667//GO:0019028//GO:0005634	transcription factor complex//viral capsid//nucleus	KOG0627	Heat shock transcription factor	--			0.432482567	0.293537723681122	0.559096058492959	0.588324439	0.837030296387145	-0.508667875143056	3.008030116	1.06387076161525	1.49949610740856	0.826097600307625	4.17314343825517	-2.33675036362033	GTTTCTTCACGCAGCAAGCATTTGGCGACCCTAATCCTGGCTCTGTCCATTTGTACATGACCCTTCTTGTCGACTAACCATCATGGCTACAGCTCATATGGCCGTCAGGACTGAAACGTTCCCGCATTCGACCTCCATCCCCCATAGCGAGTCAATGGGCGCTCGCATTATTCCTTTACCTACTCCAACGATCAAGATGTCTCCTCCAAGTAACGGCGACCCGATGGAGATAACTTCACCTGCTCCATCTTCGAATGGCAACCACAACTCCGACTCCGAAACCAATGGCAAATCCAACGACCGACCCAAGAACTCTCCCGCCCCCGATTCACACGGTTCGAACAATCATGCCAATAACTCAAACAGCATGCCAGCGCCTCCTCCGGCTGCTGCTGCTAT…
	comp56382_c0	285	truncated heat shock factor B2a [Arabidopsis thaliana]	--	heat shock transcription factor, other eukaryote	http://www.genome.jp/dbget-bin/www_bget?ko:K09419	Heat stress transcription factor B-2a OS=Arabidopsis thaliana GN=HSFB2A PE=2 SV=1	HSF-type DNA-binding	GO:0006355	regulation of transcription, DNA-dependent	GO:0043565//GO:0003700	sequence-specific DNA binding//sequence-specific DNA binding transcription factor activity	GO:0005667//GO:0005634	transcription factor complex//nucleus	KOG0627	Heat shock transcription factor	--	Bra029291|Bra029291.1	AT5G62020 (E=2e-056) AT-HSFB2A, HSFB2A | AT-HSFB2A; DNA binding / transcription factor	8.489900792	0.272595266202118	4.9609152812734	4.53891114	2.15255726423123	1.076294626378	13.3743124795	14.9067067892208	-0.156496840415712	9.7228089646104	5.81311559644667	0.74206157783813	TGGAGAAGTTGTTGTGTTTGAAGTGTTTTGGAAGCAAGTCTCTAGCGAAGTCTGTCGGGTTCCATACAACGAAGGAGGAACCATCTTCGTTCCAGGAGATTACGTCGTTGGTAGAAGGGTCTTCCACGAGGTTAAAAGTCTTGGTGAGAAACGGCGTCGGAGCAGTTCTCTGAGATTCATTGGTAGCCATCGTGGTATAACTGTTATCGCTCGGAGACATACAGATTGTGAAAATAGAAGTTCTAAGAAAGCAATGATTTGATTAAAGAAACTAAAAAGAAAGAA
	comp19317_c0	534	unnamed protein product [Thellungiella halophila]	Thellungiella halophila mRNA, complete cds, clone: RTFL01-01-A16	heat shock transcription factor, other eukaryote	http://www.genome.jp/dbget-bin/www_bget?ko:K09419	Heat stress transcription factor A-4a OS=Arabidopsis thaliana GN=HSFA4A PE=2 SV=1	RasGAP C-terminus//Autophagy protein Apg6//FlgN protein//Rho Binding//Ribonuclease E/G family//Centromere protein H (CENP-H)	GO:0006355//GO:0007059//GO:0000910//GO:0006914//GO:0007264//GO:0051301//GO:0016310//GO:0009069//GO:0009296//GO:0006468	regulation of transcription, DNA-dependent//chromosome segregation//cytokinesis//autophagy//small GTPase mediated signal transduction//cell division//phosphorylation//serine family amino acid metabolic process//flagellum assembly//protein phosphorylation	GO:0005099//GO:0004674//GO:0043565//GO:0003700//GO:0003723//GO:0005524//GO:0043515	Ras GTPase activator activity//protein serine/threonine kinase activity//sequence-specific DNA binding//sequence-specific DNA binding transcription factor activity//RNA binding//ATP binding//kinetochore binding	GO:0019861//GO:0005634//GO:0000777//GO:0005667//GO:0005622	flagellum//nucleus//condensed chromosome kinetochore//transcription factor complex//intracellular	--	--	AT4G18880	Bra013358|Bra013358.1	AT4G18880 (E=8e-149) AT-HSFA4A, HSF A4A | AT-HSFA4A; DNA binding / transcription factor	2.57489411	1.45486237579782	0.82363041772685	2.826194671	2.15406889152353	0.391796452358301	4.539842305	2.79151812532224	0.701592261672421	2.80885639816112	4.01500713700382	-0.515419683202595	GAAGAACATTCATAGACGCAAACCCGTTCACAGCCACTCTCTACCTAACCTCCAAGCTCAGCAGAACCCGTTGTCGGATTCAGAACGGTTGAGAATGAGCAGTCAGATCGAGAGACTCACCAAGGAGAAAGAAGGGTTGCTTCAGAAGTTACATAAACAAGAGCAAGAACGAGATGTGTTTGAGCAACACGTTAAGACGCTGAAAGATCAGTTGCAACACATGGAGAAGCGTCAGAAAACAATGGATTCTTATGTCTCTCAGGTTATGGAAACACCAGAGCTTGCTTTAAATCTCTCGCCGTGTCTACCTGACACGAACGAGAGGAAAAGAAGGCTCCCTAGGATGTTGGAAGATAACCAGACATGTGTTGTTGTGAGAGAGGAAGGCTCTACGAGCGC…
	comp41623_c0	1668	hypothetical protein ARALYDRAFT_919451 [Arabidopsis lyrata subsp. lyrata]	Arabidopsis thaliana truncated heat shock factor B2a mRNA, complete cds, alternatively spliced	heat shock transcription factor, other eukaryote	http://www.genome.jp/dbget-bin/www_bget?ko:K09419	Heat stress transcription factor B-2a OS=Arabidopsis thaliana GN=HSFB2A PE=2 SV=1	HSF-type DNA-binding	GO:0006355	regulation of transcription, DNA-dependent	GO:0043565//GO:0003677//GO:0003700	sequence-specific DNA binding//DNA binding//sequence-specific DNA binding transcription factor activity	GO:0005667//GO:0005634	transcription factor complex//nucleus	KOG0627	Heat shock transcription factor	AT5G62020	Bra010049|Bra010049.1	AT5G62020 (E=4e-105) AT-HSFB2A, HSFB2A | AT-HSFB2A; DNA binding / transcription factor	34.57614447	13.9263822598402	1.31195647632231	14.28273972	12.8727570208073	0.149951668520247	25.57927195	27.4362049417912	-0.101105735305437	20.8594723308956	27.8693750796637	-0.417977989617475	CGAACGATTAGATTTCGCTAATATTCAAGCAACCAATTGGGATCTATTGTTTTAAAATAATCAAAACCACATGTGATTTGTGATGATCTATTCGTTACATAATAATCGTCATCCACAGTAAACTACAATTCAAGTTCTACTACTAAATAGTAAATACTAATTATTGATTATAGAGAATCTACTAGTGATATTTGAAGAAACGTTGTCCACGTTGTATGATCCGCGCCCGCGCCCACCAAACAGGAGATTCCGGAAGCTTCACCACAACTTCCAGTTTCGCTATTAATGCTAATTGATCTGTTCTCTACATCTCCTTCAGCTAGACAATTATTATAATTTTATATCCCCAAAAGAGAAAAAGAAATGAAAAAAGTCAAAAAGAGCGTTTTTTTATTATGA…
MYC	comp16843_c0	2187	MYC [Brassica oleracea var. gemmifera]	Brassica oleracea var. gemmifera MYC mRNA, complete cds	transcription factor MYC2	http://www.genome.jp/dbget-bin/www_bget?ko:K13422	Transcription factor MYC2 OS=Arabidopsis thaliana GN=RAP1 PE=1 SV=2	--	--	--	GO:0046983	protein dimerization activity	--	--	--	--	AT1G32640	Bra010178|Bra010178.1	AT1G32640 (E=5e-263) ATMYC2, RD22BP1, JAI1, JIN1, MYC2, ZBF1 | MYC2; DNA binding / transcription activator/ transcription factor	17.263	14.0299623274623	0.299172071583292	8.625902801	30.5056340687091	-1.82232835323453	36.99176929	63.9512716573042	-0.789768741883969	36.2885872291521	81.4118325762783	-1.16572260266703	CAGAAAGTGTATGTTTTATTTGAAGAGGTGATCTCAGATTCATTTATGTTTCTTTCCCTAAAAAGAAGAAAGATTCTAAACCCTTACTGTCTCTGCGATGGAACCATCGAGAAACCAATTAGGAACTCTACTGTCTCATATAATATATATATACACGTTACACATTCAATTACGATACAGACTGGAGGAGCAAAAGAAGCGTGTCGTTCTTTTTTTGGACAGTTCTTAATACACAACAATTACAGCTATAAGATTACTGGAACCCATTAAAACAAATTAGTTATGATTTTAACCGATCTTTGAAACTAAACTCGCCTGGAGCTGGTCCTGTGTGTAGATTCTGAACCCCATCTTGACTGTAGCTTGCTGAATCATCAAATCGTTAACCACCGACATACT…
